# Supplementary material for: Using the common cold virus as a naturally occurring vaccine to prevent COVID-19: Lessons from Edward Jenner
Source: publisher site journal article supplement (doi:10.18632/aging.104166), 2020-10-13
Supplement: Supplementary file [file aging-v12i19-104166-supplementary-material-SD1.pdf]

## Note Added in Proof

After this *Perspective Article* was submitted for peer-review, another relevant paper appeared in the *British Medical Journal (BMJ)*, highlighting the role of human coronaviruses associated with the common cold in conferring cross-reactive immunity to SARS-CoV-2 in the world population.

<https://www.bmj.com/content/370/bmj.m3563.full>

Doshi P. Covid-19: Do many people have pre-existing immunity? *The British Medical Journal*. 2020; 370:m3563.
